# Supplementary material for: Toxicity assessment of phospholipid micelle-encapsulated cadmium-based quantum dots using Kunming mice
Source: Royal Society of Chemistry journal article supplement (doi:10.1039/c2ra21990e), 2012-11-26
Supplement: c2ra21990e.pdf [file c2ra21990e.pdf]

## Electronic Supplementary Information

### Toxicity assessment of phospholipids micelle-encapsulated cadmium-based Quantum Dots using Kunming mice

Jing Liu<sup>a#</sup>, Wing-Cheung Law<sup>b#</sup>, Jianwei Liu<sup>a#</sup>, Rui Hu<sup>c</sup>, Liwei Liu<sup>d</sup>, Jing Zhu<sup>e</sup>, Hongyan Chen<sup>a</sup>, Jianhua  
5 Wang<sup>a</sup>, Yazhuo Hu<sup>a</sup>, Ling Ye<sup>a\*</sup>, and Ken-Tye Yong<sup>c\*</sup>

<sup>a</sup> Institute of Gerontology and Geriatrics, Chinese PLA General Hospital, Beijing 100853, PR China

<sup>b</sup> Institute for Lasers, Photonics and Biophotonics, University at Buffalo, State University of New York, Buffalo, NY 14260-4200, USA

<sup>c</sup> School of Electrical and Electronic Engineering, Nanyang Technological University, Singapore 639798, Singapore

<sup>d</sup> School of Science, Changchun University of Science and Technology, Changchun 130022, Jilin, China

<sup>e</sup> Shanghai Institute of Optics and Fine Mechanics, Chinese Academy of Sciences, Shanghai, 201800, China

# These authors contributed equally to this work

\* Corresponding Authors: ktyong@ntu.edu.sg; lye301@gmail.com

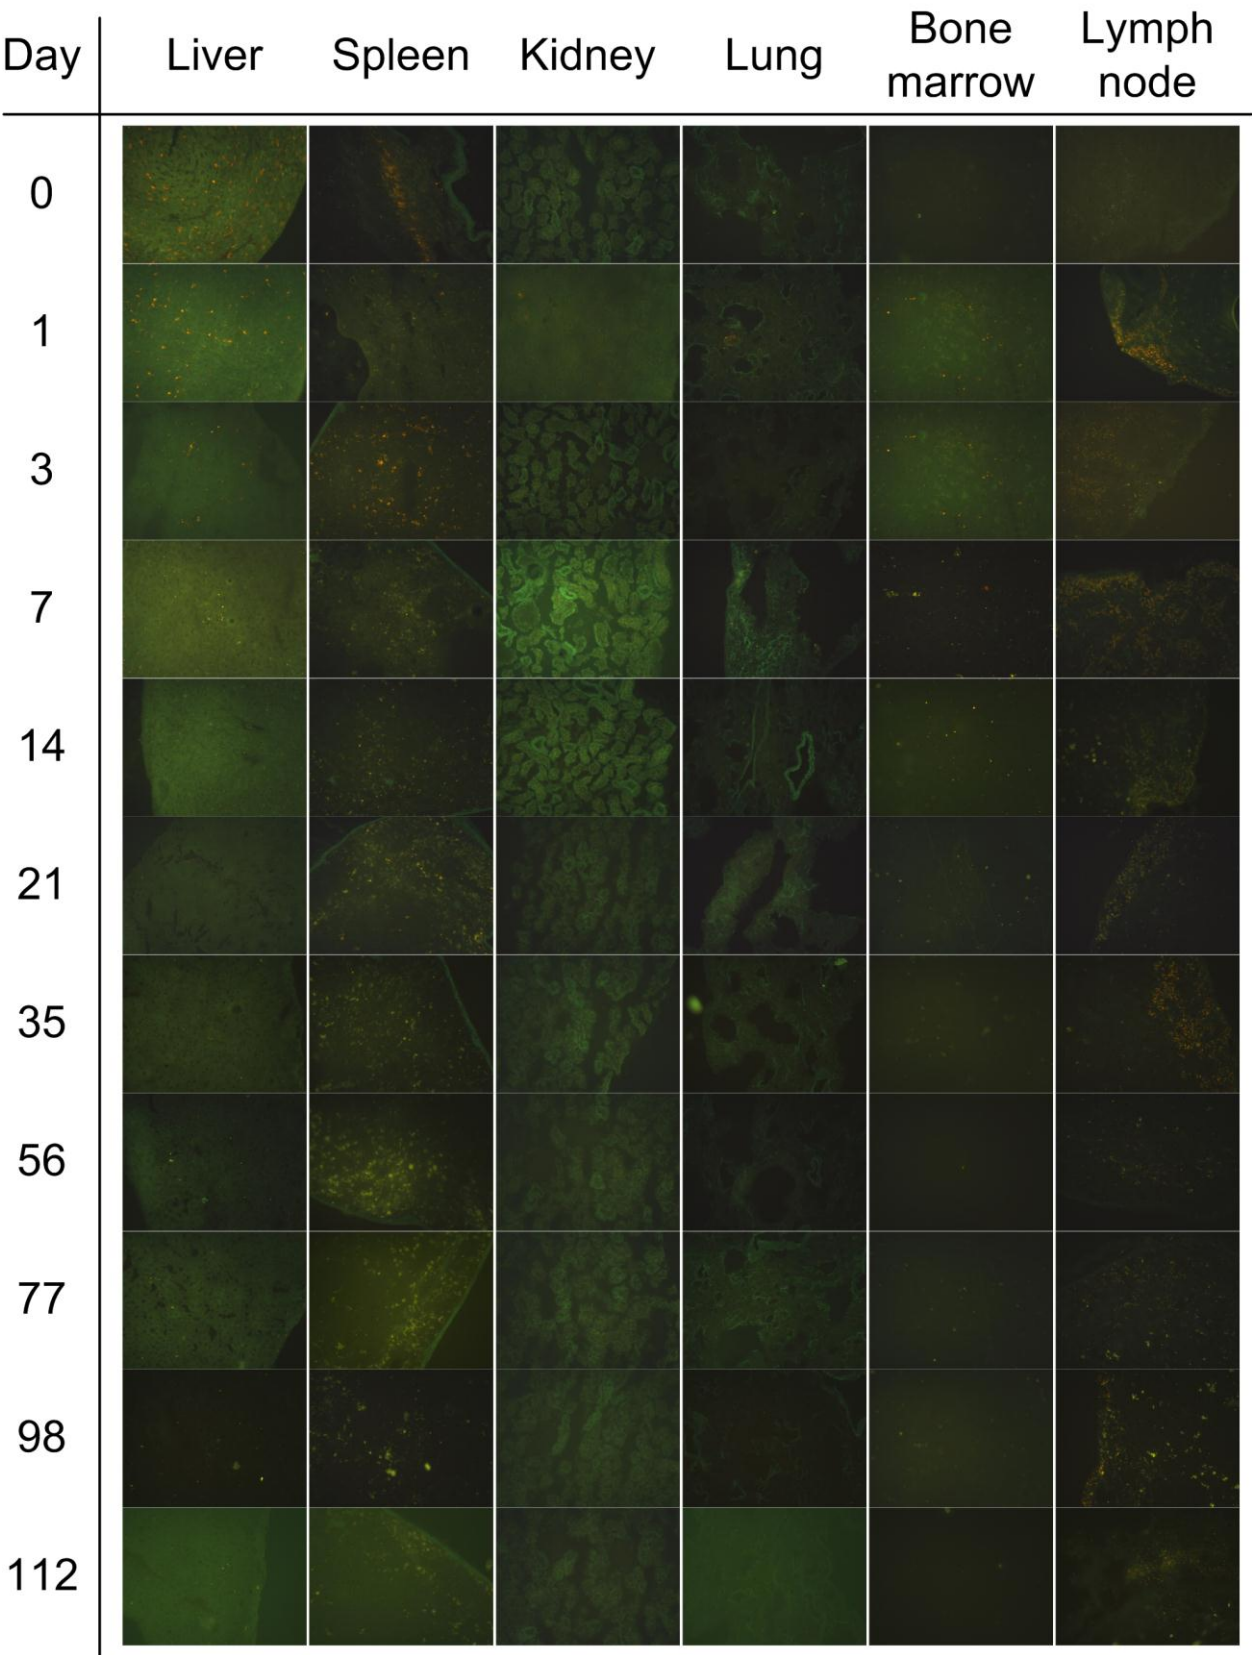

Figure S1. High resolution image of Figure 3

| Day                 | Liver                                                                               | Spleen                                                                              | Kidney                                                                               | Lung                                                                                  | Brain                                                                                 |
|---------------------|-------------------------------------------------------------------------------------|-------------------------------------------------------------------------------------|--------------------------------------------------------------------------------------|---------------------------------------------------------------------------------------|---------------------------------------------------------------------------------------|
| Control<br>(Day 1)  | 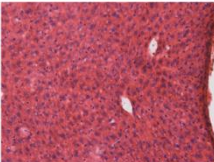   |    |    |    |    |
| 1                   |    |    |    |    |    |
| 3                   |    |    |    |    |    |
| 35                  |    |    |    |    |    |
| 112                 |   |   |   |   |   |
| Control<br>(Day112) |  |  |  |  |  |



| Day              | Lymph node                                                                          | Heart                                                                               | Intestine                                                                            | Muscle                                                                                | Thymus                                                                                |
|------------------|-------------------------------------------------------------------------------------|-------------------------------------------------------------------------------------|--------------------------------------------------------------------------------------|---------------------------------------------------------------------------------------|---------------------------------------------------------------------------------------|
| Control (Day 1)  | 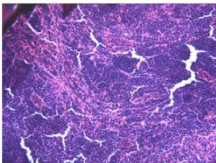   |    |    |    |    |
| 1                |    |    |    |    |    |
| 3                |    |    |    |    |    |
| 35               |    |    |    |    |    |
| 112              |   |   |   |   |   |
| Control (Day112) |  |  |  |  |  |

Figure S2. High resolution image of Figure 5
